# Supplementary material for: Late-Onset N-Acetylglutamate Synthase Deficiency: Report of a Paradigmatic Adult Case Presenting with Headaches and Review of the Literature
Source: MDPI journal article supplement (doi:10.3390/ijms19020345), 2018-01-24
Supplement: s1 [file s1]

**Table S1. Characteristics of headache in the patient based on a retrospective questionnaire.**

|                                            |                                                                                                                     |
|--------------------------------------------|---------------------------------------------------------------------------------------------------------------------|
| <b>Starting age</b>                        | 11 years, coinciding with menarche                                                                                  |
| <b>Family history for headaches</b>        | Negative                                                                                                            |
| <b>Initial location of pain</b>            | Frontal region between the eyes                                                                                     |
| <b>Successive location of pain</b>         | Frontal region                                                                                                      |
| <b>Type of pain</b>                        | Pulsating and continuous                                                                                            |
| <b>Average pain level (1–10 scale)</b>     | 7                                                                                                                   |
| <b>Worst pain level (1–10 scale)</b>       | 10                                                                                                                  |
| <b>Average frequency</b>                   | Three to four headaches per week                                                                                    |
| <b>Frequency of the most severe bouts</b>  | Four to five headaches per month                                                                                    |
| <b>Average duration</b>                    | Not determinable because the patient took analgesics within 1–2 hours from the onset of pain                        |
| <b>Time of occurrence during the day</b>   | Variable                                                                                                            |
| <b>Seasonality</b>                         | Not significant, even if headaches were more frequent after sun exposure                                            |
| <b>Triggering factors</b>                  | Stress, meal consumption, menstrual cycle, pregnancy, insomnia, sun exposure and bright lights                      |
| <b>Impact on quality of life</b>           | Important impact on daily activities without prompt analgesic treatment                                             |
| <b>Pre-headache symptoms</b>               | Cenesthetic symptoms, amaurosis fugax (one time) and sleep disorder                                                 |
| <b>Associated symptoms during the bout</b> | Increased sensitivity to light, nausea, vomiting, tachycardia, poor concentration, confusion and behavioral changes |
| <b>Improvement factors</b>                 | Darkness and analgesics                                                                                             |
| <b>Drugs for acute pain</b>                | Acetylsalicylic acid; Ibuprofen                                                                                     |

**Table S2. Main results of biochemical tests performed in the patient during the last acute episode (52 years of age) after initiation of arginine therapy.**

| <b>Plasma Metabolite</b> | <b>Measured Value<br/>(<math>\mu\text{mol/L}</math>)</b>            | <b>Normal Value<br/>(<math>\text{mol/L}</math>)</b>               |
|--------------------------|---------------------------------------------------------------------|-------------------------------------------------------------------|
| Citrulline               | 30                                                                  | 17–53                                                             |
| Glutamine                | 809                                                                 | 399–823                                                           |
| Arginine                 | 197                                                                 | 38–135                                                            |
| Ornithine                | 266                                                                 | 25–159                                                            |
| Alanine                  | 584                                                                 | 206–498                                                           |
| <b>Urine metabolite</b>  | <b>Measured Value<br/>(<math>\text{mmol/mol creatinine}</math>)</b> | <b>Normal Value<br/>(<math>\text{mmol/mol creatinine}</math>)</b> |
| Citrulline               | 8                                                                   | 0–4                                                               |
| Glutamine                | 65                                                                  | 20–76                                                             |
| Arginine                 | 764                                                                 | 0–5                                                               |
| Ornithine                | 314                                                                 | 0–5                                                               |
| Alanine                  | 56                                                                  | 16–68                                                             |
| Orotic acid              | 0.74                                                                | 0.2–1.1                                                           |

Plasma citrulline and glutamine were normal; plasma arginine, ornithine and alanine were conversely increased. Urinary glutamine, alanine and orotic acid were normal; increased urinary excretion of citrulline, arginine and ornithine was also detected. These findings were inconclusive for UCD diagnosis but could be compatible with a UCD during treatment.
